# Supplementary material for: Adverse metabolic outcomes in the early and late postpartum after gestational diabetes are broader than glucose control
Source: HighWire-hosted journal article supplement (doi:10.1136/bmjdrc-2021-002382), 2021-11-01
Supplement: bmjdrc-2021-002382supp001_data_supplement.pdf [file bmjdrc-2021-002382supp001_data_supplement.pdf]

## Supplementary Appendix.

### Supplementary Table 1: Factors used for evaluation of predictors of obesity, prediabetes and MetS-WC at 1 year postpartum

---

#### Factors extracted with a p-value $\leq 0.20$ in a multiple stepwise regression

BMI before pregnancy/at the end of pregnancy/at 6-8 weeks PP  
Waist circumference 6-8 weeks PP  
Gestational weight gain  
Fasting glucose at GDM diagnosis/at 6-8 weeks PP  
Glycemia t60 at GDM diagnosis  
Glycemia t120 at GDM diagnosis/at 6-8 weeks PP  
HbA1c at first GDM visit/at the end of pregnancy/at 6-8 weeks PP  
Systolic blood pressure at first GDM visit/at the end of pregnancy/at 6-8 weeks PP  
Diastolic blood pressure at first GDM visit/at the end of pregnancy/at 6-8 weeks PP  
LDL-cholesterol at 6-8 weeks PP  
HDL-cholesterol at 6-8 weeks PP  
Triglycerides at 6-8 weeks PP  
WHO-score at first GDM visit/at the end of pregnancy/at 6-8 weeks PP  
EPDS at first GDM visit/at 6-8 weeks PP  
History of psychological illness at first GDM visit  
Nationality at first GDM visit, professional status at first GDM visit  
Smoking status at first GDM visit  
Physical activity before pregnancy/during pregnancy  
Familial history of diabetes at first GDM visit  
History of gestational diabetes at first GDM visit  
Previous pregnancy at first GDM visit  
Treatment during pregnancy (metformin and/or insulin)  
Breastfeeding at 6-8 weeks PP  
Contraception at 6-8 weeks PP

#### “Non metabolic” factors

WHO-score at first GDM visit/at the end of pregnancy/at 6-8 weeks PP  
EPDS at 6-8 weeks PP  
Nationality at first GDM visit  
Professional status at first GDM visit  
Smoking status at first GDM visit  
Physical activity before pregnancy/during pregnancy  
Familial history of diabetes at first GDM visit  
History of gestational diabetes at first GDM visit  
Previous pregnancy at first GDM visit  
Treatment during pregnancy (metformin and/or insulin)  
Breastfeeding at 6-8 weeks PP  
Contraception at 6-8 weeks PP

---

Abbreviations: BMI, body mass index; EPDS, Edinburgh postnatal depression score; GDM, gestational diabetes; HDL, high-density lipoprotein; LDL, low-density lipoprotein; MetS, metabolic syndrome; OR, odd ratio; PP, postpartum; WHO, world health organisation.

**Supplementary Table 2: Detailed descriptive data of the main cohort.**

|                                   | Before pregnancy<br>(n = 622) | First GDM visit<br>(n = 605) | End of pregnancy<br>(n=556) | Early PP visit<br>(n = 622) |
|-----------------------------------|-------------------------------|------------------------------|-----------------------------|-----------------------------|
| Weight (kg)                       | 69.2 ± 15.2                   | 79.8 ± 15.1                  | 82.0 ± 14.9                 | 74.0 ± 15.0                 |
| Waist circumference (cm)          | -                             | -                            | -                           | 93.7 ± 11.3                 |
| BMI (kg/m <sup>2</sup> )          | 25.9 ± 5.3                    | 29.8 ± 5.2                   | 30.7 ± 5.1                  | 27.7 ± 5.2                  |
| BMI category (kg/m <sup>2</sup> ) |                               |                              |                             |                             |
| Normal (< 25.0)                   | 317 (51.1)                    |                              |                             | 212 (34.1)                  |
| Overweight (25.0-29.9)            | 179 (28.8)                    |                              |                             | 231 (37.0)                  |
| Obesity class I (30.0-34.9)       | 91 (14.7)                     | -                            | -                           | 124 (19.9)                  |
| Obesity class II (35.0-39.9)      | 22 (3.5)                      |                              |                             | 38 (6.1)                    |
| Obesity class III (≥ 40.0)        | 12 (1.9)                      |                              |                             | 17 (2.7)                    |
| Metabolic syndrome                |                               |                              |                             |                             |
| WC-defined                        | -                             | -                            | -                           | 148 (23.8)                  |
| BMI-defined                       |                               |                              |                             | 64 (10.3)                   |
| OGTT (mmol/L)                     |                               |                              |                             |                             |
| T0                                |                               | 5.2 ± 0.7                    |                             | 5.0 ± 0.5                   |
| T60                               | -                             | 9.7 ± 1.9 (n=473)            | -                           | -                           |
| T120                              |                               | 7.9 ± 1.9 (n=496)            |                             | 5.5 ± 1.7                   |
| HbA1c                             |                               | (n=598)                      | (n=266)                     |                             |
| %                                 | -                             | 5.5 ± 0.4                    | 5.5 ± 0.4                   | 5.4 ± 0.4                   |
| mmol/mol                          |                               | 37.0 ± 4.4                   | 37.0 ± 4.4                  | 36.0 ± 4.4                  |
| Prediabetes, n (%)                | -                             | -                            | -                           | 180 (28.9)                  |
| Blood pressure (mmHg)             |                               | (n=557)                      | (n=517)                     |                             |
| Systolic                          | -                             | 114.5 ± 11.0                 | 115.8 ± 11.5                | 113.9 ± 12.8                |
| Diastolic                         |                               | 71.8 ± 9.0                   | 74.2 ± 9.8                  | 73.8 ± 9.9                  |
| Lipids (mmol/L)                   |                               |                              |                             |                             |
| Total cholesterol                 |                               |                              |                             | 5.2 ± 1.0                   |
| LDL-cholesterol                   | -                             | -                            | -                           | 3.1 ± 0.9                   |
| HDL-cholesterol                   |                               |                              |                             | 1.5 ± 0.4                   |
| Triglycerides                     |                               |                              |                             | 1.3 ± 0.8                   |

Data are presented as mean ± SD, or as n (%). The number of patients for each analysis is indicated in brackets and in *italic*, when different from the total number of patients. Abbreviations: BMI, body mass index; GDM, gestational diabetes mellitus; HDL, high-density lipoprotein; LDL, low-density lipoprotein; OGTT, oral glucose tolerance test; PP, postpartum; SD, standard deviation; WC, waist circumference.

**Supplementary Table 3: Detailed descriptive data of the long-nested cohort.**

|                                   | Before pregnancy<br>(n = 162) | First GDM visit<br>(n = 157) | End of<br>pregnancy<br>(n = 146) | Early PP visit<br>(n = 162) | Late PP visit<br>(n = 162) |
|-----------------------------------|-------------------------------|------------------------------|----------------------------------|-----------------------------|----------------------------|
| Weight (kg)                       | 70.1 ± 14.2                   | 80.6 ± 14.6                  | 82.9 ± 13.8                      | 74.6 ± 13.7                 | 74.1 ± 16.6                |
| Waist circumference (cm)          | -                             | -                            | -                                | 94.6 ± 9.8                  | 91.8 ± 12.4                |
| BMI (kg/m <sup>2</sup> )          | 26.2 ± 4.9                    | 30.2 ± 5.0                   | 31.1 ± 4.8                       | 27.9 ± 4.7                  | 27.7 ± 5.8                 |
| BMI category (kg/m <sup>2</sup> ) |                               |                              |                                  |                             |                            |
| Normal (< 25.0)                   | 78 (48.1)                     |                              |                                  | 46 (28.4)                   | 64 (39.5)                  |
| Overweight (25.0-29.9)            | 52 (32.1)                     |                              |                                  | 69 (42.6)                   | 46 (28.4)                  |
| Obesity class I (30.0-34.9)       | 25 (15.4)                     | -                            | -                                | 34 (21.0)                   | 32 (19.7)                  |
| Obesity class II (35.0-39.9)      | 4 (2.5)                       |                              |                                  | 11 (6.8)                    | 15 (9.3)                   |
| Obesity class III (≥ 40.0)        | 3 (1.9)                       |                              |                                  | 2 (1.2)                     | 5 (3.1)                    |
| Metabolic syndrome                |                               |                              |                                  |                             |                            |
| WC-defined                        | -                             | -                            | -                                | 35 (21.6)                   | 50 (32.1)                  |
| BMI-defined                       |                               |                              |                                  | 13 (8.0)                    | 26 (16.7)                  |
| OGTT (mmol/L)                     |                               |                              |                                  |                             |                            |
| T0                                |                               | 5.3 ± 1.0 (n=157)            |                                  | 5.0 ± 0.6                   | 5.5 ± 0.7                  |
| T60                               | -                             | 9.7 ± 2.2 (n=121)            | -                                | -                           | -                          |
| T120                              |                               | 7.8 ± 2.0 (n=122)            |                                  | 5.3 ± 1.7                   | -                          |
| HbA1c                             |                               |                              | (n=122)                          |                             |                            |
| %                                 | -                             | 5.5 ± 0.4                    | 5.5 ± 0.4                        | 5.3 ± 0.4                   | 5.4 ± 0.4                  |
| mmol/mol                          |                               | 37.0 ± 4.4                   | 37.0 ± 4.4                       | 34.0 ± 4.4                  | 36.0 ± 4.4                 |
| Prediabetes                       | -                             | -                            | -                                | 42 (25.9)                   | 76 (47.2)                  |
| Blood pressure (mmHg)             |                               |                              |                                  |                             |                            |
| Systolic                          | -                             | 113.7 ± 10.2                 | 115.2 ± 10.3                     | 112.3 ± 11.8                | 114.4 ± 11.1               |
| Diastolic                         |                               | 71.2 ± 8.7                   | 73.8 ± 9.3                       | 72.0 ± 8.2                  | 72.3 ± 9.4                 |
| Lipids (mmol/L)                   |                               |                              |                                  |                             |                            |
| Total cholesterol                 |                               |                              |                                  | 5.2 ± 1.0                   | 4.4 ± 0.8                  |
| LDL-cholesterol                   | -                             | -                            | -                                | 3.1 ± 0.9                   | 2.5 ± 0.7                  |
| HDL-cholesterol                   |                               |                              |                                  | 1.5 ± 0.4                   | 1.4 ± 0.4                  |
| Triglycerides                     |                               |                              |                                  | 1.3 ± 0.7                   | 1.2 ± 0.7                  |

Data are presented as mean ± SD, or as n (%). The number of patients for each analysis is indicated in brackets and in italic, when different from the total number of patients. Abbreviations: BMI, body mass index; GDM, gestational diabetes mellitus; HDL, high-density lipoprotein; LDL, low-density lipoprotein; OGTT, oral glucose tolerance test; PP, postpartum; SD, standard deviation; WC, waist circumference.
